# Supplementary material for: Stabilising a Mn3O4 nanosheet on graphene via forming a 2D–2D nanostructure for improvement of lithium storage
Source: Royal Society of Chemistry journal article supplement (doi:10.1039/c5ra19897f), 2015-01-01
Supplement: c5ra19897f1.pdf [file c5ra19897f1.pdf]

# Supplementary Information for

## Stabilising Mn<sub>3</sub>O<sub>4</sub> Nanosheet on Graphene *via*

### Forming 2D-2D Nanostructure for Improvement of

### Lithium Storage

Yanhong Zhao,<sup>a,b</sup> Gang Chen,<sup>a\*</sup> Chunshuang Yan,<sup>a</sup> Chade Lv,<sup>a</sup> Rui Wang<sup>a</sup> and Jingxue Sun<sup>a</sup>

<sup>a</sup> Department of Chemistry, Harbin Institute of Technology, Harbin 150001, China. Email: gchen@hit.edu.cn.

<sup>b</sup> College of Environmental and Chemical Engineering, Heilongjiang University of Science and Technology, Harbin 150022, China, Email: zhaoyh08@126.com

1. To test the formation mechanism of 2D-2D Mn<sub>3</sub>O<sub>4</sub>-NS/GNS, the XRD image for reaction intermediate of MnOOH is shown in Fig. S1.

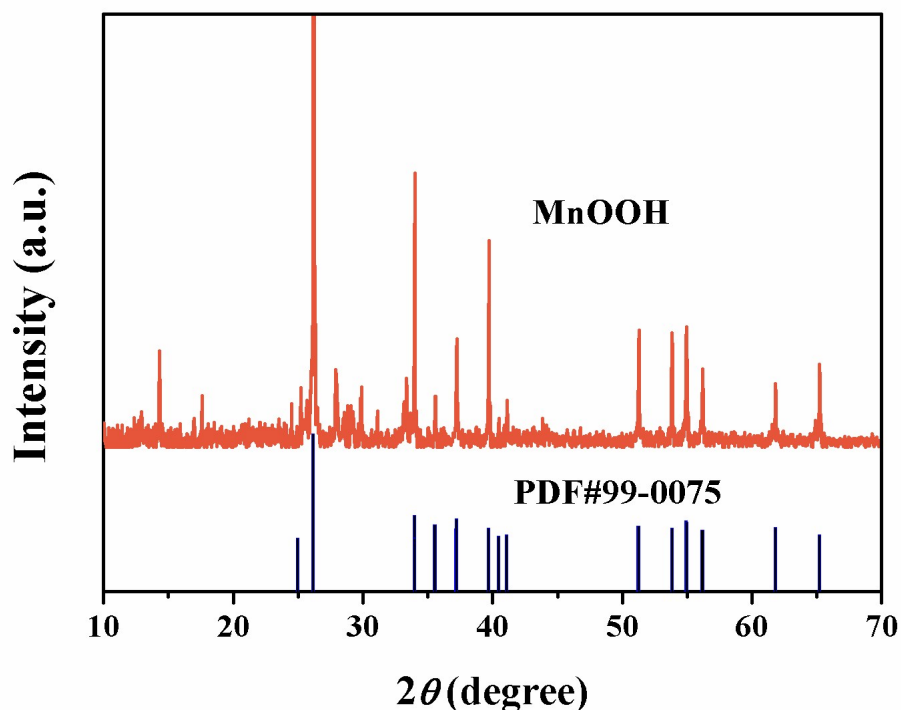

Fig. S1 X-Ray diffraction patterns of MnOOH.

2. The electrochemical performance of GN for comparing with the Mn<sub>3</sub>O<sub>4</sub>-NS/GNS composite is showed.

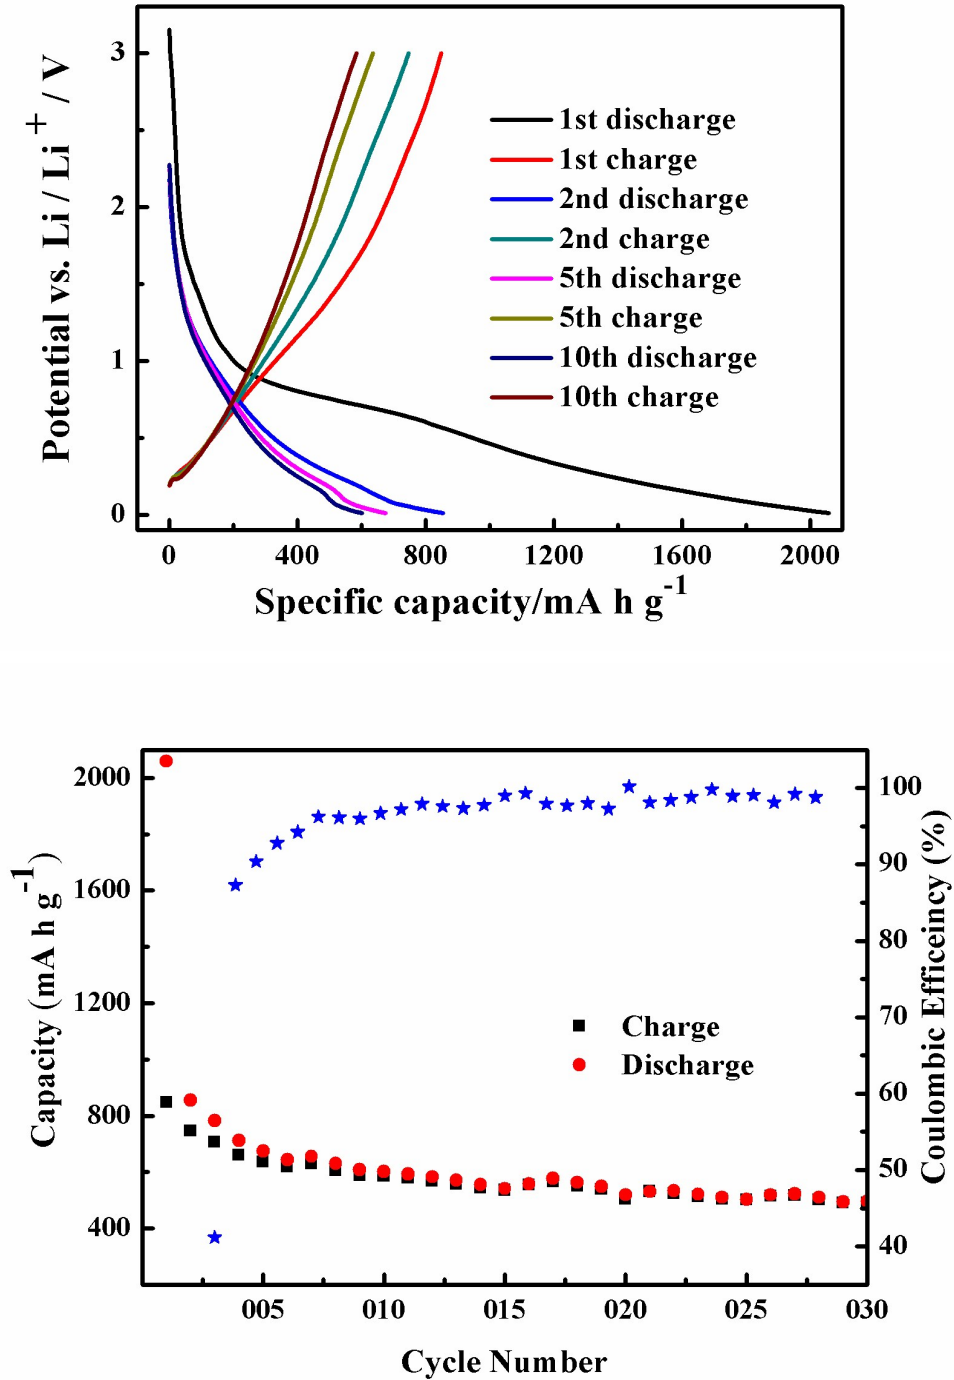

Fig. S2. Electrochemical characterization of graphene nanosheets (GNS) as electrode materials, (a) Galvanostatic charge and discharge curves for GNS at a current density of  $50 \text{ mA g}^{-1}$  for various cycles (1st, 2nd, 5th and 10th); (b) capacity retentions of two samples for 50 cycles at  $50 \text{ mA g}^{-1}$ .

3. EIS patterns of mica-like  $\text{Mn}_3\text{O}_4$  and  $\text{Mn}_3\text{O}_4\text{-NS/GNS}$  composite are showed.

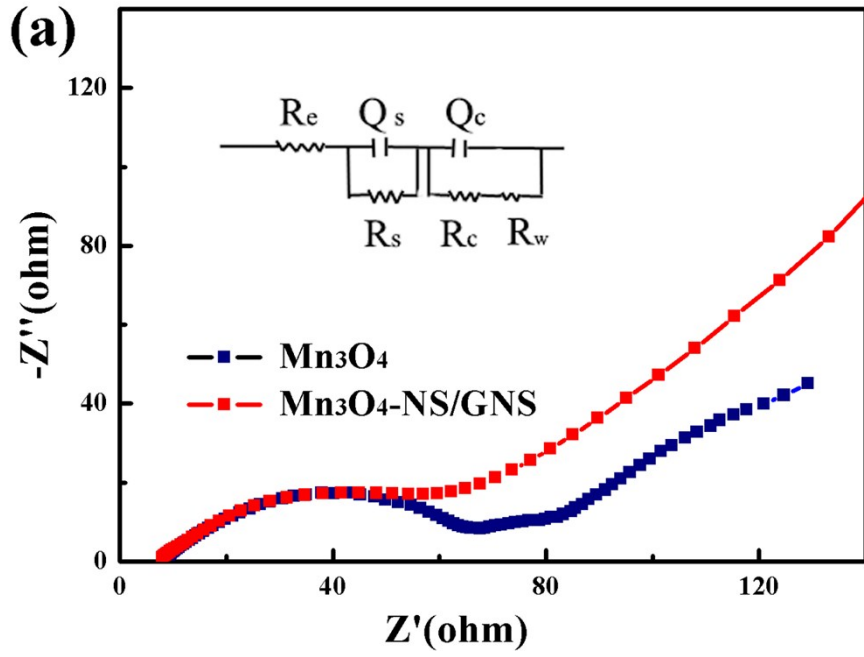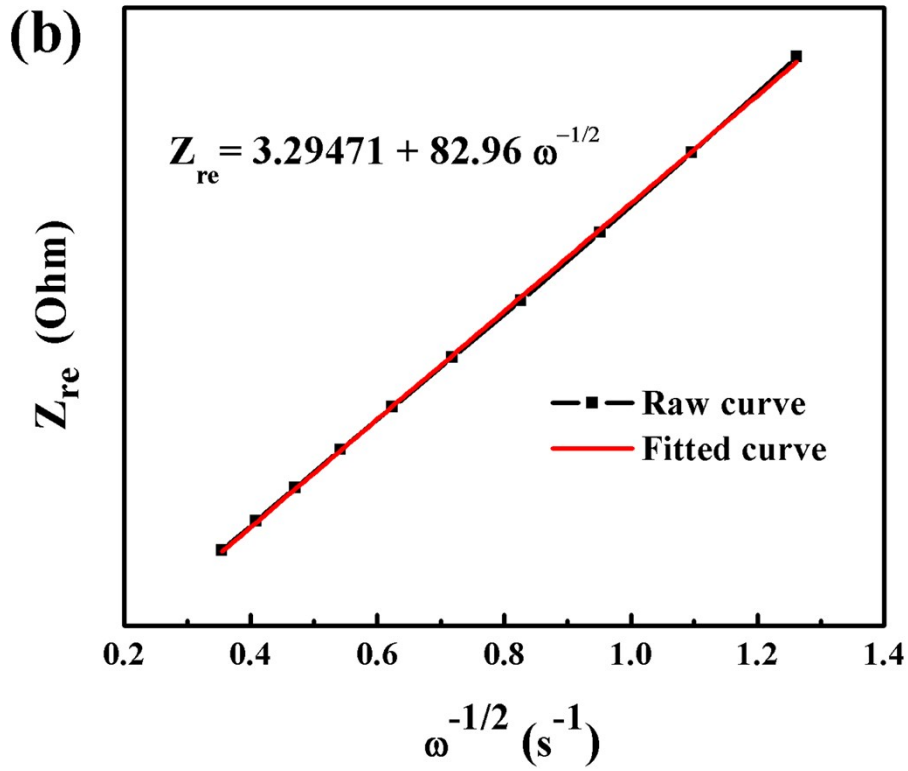

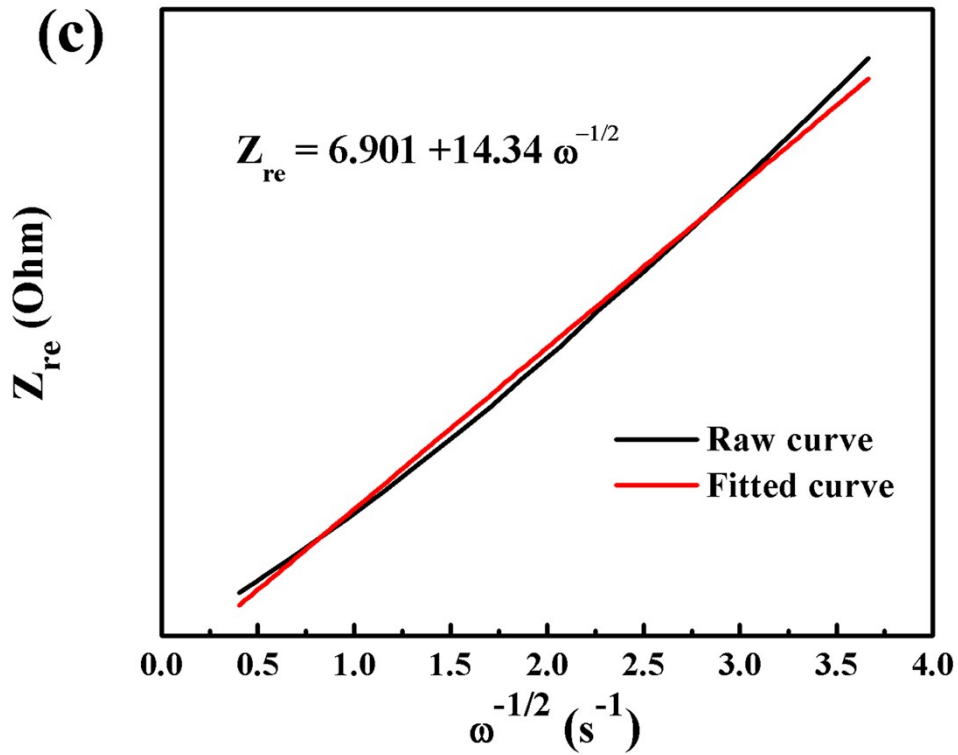

Fig. S3 EIS patterns of  $Mn_3O_4$  and  $Mn_3O_4$ -NS/GNS composite, (a) Nyquist plots for  $Mn_3O_4$  and  $Mn_3O_4$ -NS/GNS composite at same voltage; plotting of real and imaginary resistance vs. inverse square root of the angular frequency for  $Mn_3O_4$  (b) and  $Mn_3O_4$ -NS/GNS composite (c).

- The 2D structure is constructed by the  $Mn_3O_4$  nanosheets stabilizing on the graphene, in which there are re-produced space for buffering the volume changing.

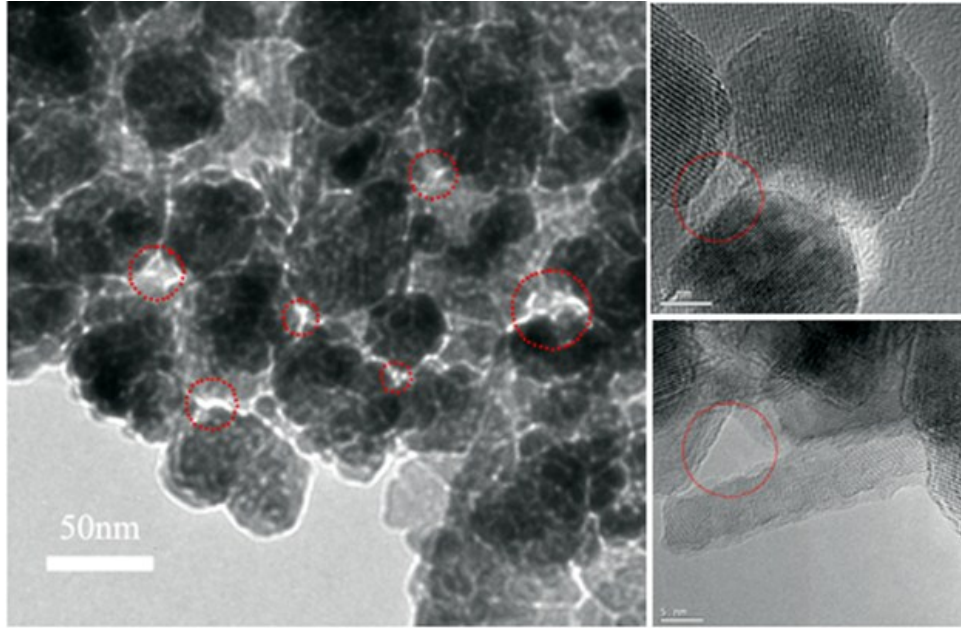

**Fig. S4** The TEM images of reproduced structure in  $\text{Mn}_3\text{O}_4\text{-NS/GNS}$  composite.

5. The structure of the  $\text{Mn}_3\text{O}_4\text{-NS/GNS}$  composite for HRTEM.

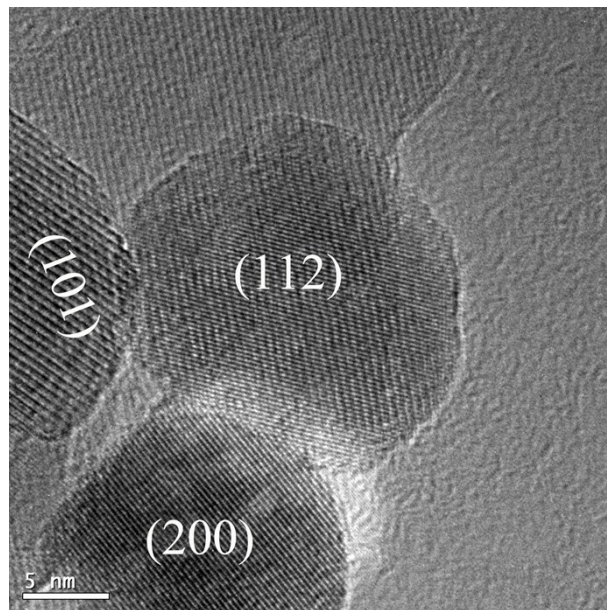

**Fig. S5** HRTEM image of  $\text{Mn}_3\text{O}_4\text{-NS/GNS}$  2D-2D structure
